# Supplementary material for: Bioengineered Model of Human LGMD2B Skeletal Muscle Reveals Roles of Intracellular Calcium Overload in Contractile and Metabolic Dysfunction in Dysferlinopathy
Source: PubMed Central journal article supplement (PMC11336985; doi:10.1002/advs.202400188), 2024-06-17
Supplement: ADVS-11-2400188-s001.pdf [file ADVS-11-2400188-s001.pdf]

## Supporting Information

for *Adv. Sci.*, DOI 10.1002/adv.202400188

Bioengineered Model of Human LGMD2B Skeletal Muscle Reveals Roles of Intracellular Calcium Overload in Contractile and Metabolic Dysfunction in Dysferlinopathy

*Alastair Khodabukus\**, *Neel K. Prabhu*, *Taylor Roberts*, *Meghan Buldo*, *Amber Detwiler*,  
*Zachary D. Fralish*, *Megan E. Kondash*, *George A. Truskey*, *Timothy R. Koves* and *Nenad Bursac\**

Supporting Information

**Title** Bioengineered model of human LGMD2B skeletal muscle reveals roles of intracellular calcium overload in contractile and metabolic dysfunction in dysferlinopathy.

**Authors**

Alastair Khodabukus,<sup>1\*</sup> Neel K. Prabhu,<sup>1</sup> Taylor Roberts,<sup>1</sup> Meghan Buldo,<sup>1</sup> Amber DeTwiler,<sup>1</sup> Zachary D.Fralish,<sup>1</sup> Megan E. Kondash,<sup>1</sup> George A. Truskey,<sup>1</sup> Tim Koves,<sup>2</sup> Nenad Bursac<sup>1\*</sup>

*Author(s), and Corresponding Author(s)\**

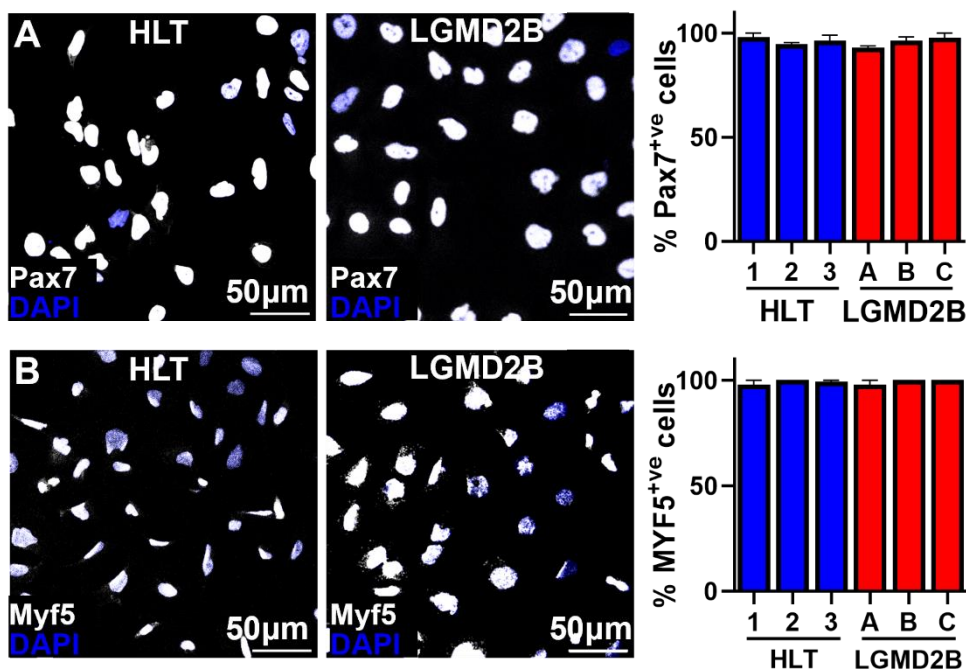

**Figure S1. Myogenic regulatory factor expression in healthy and LGMD2B iPSCs.** Representative images and quantifications of passage 2 iPSCs stained for (A) Pax7 and (B) Myf5 (N = 1 differentiation and n = 3 replicates per hiPSC line).

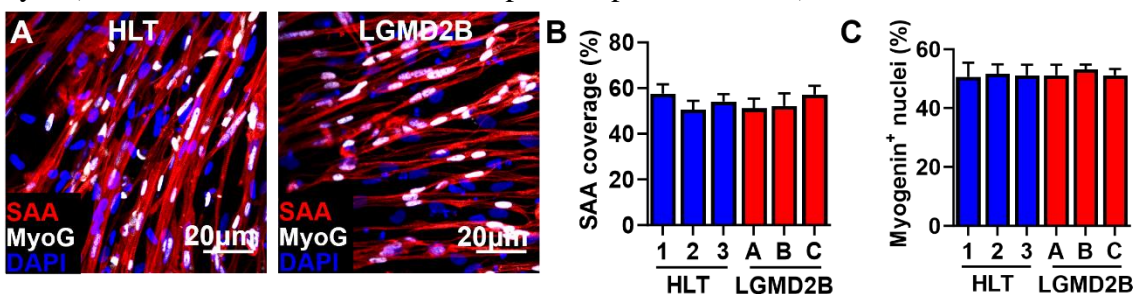

**Figure S2. Two-dimensional myogenic differentiation of healthy and LGMD2B iPSCs.** Healthy and LGMD2B iPSCs were differentiated for 8 days in traditional two-dimensional culture. (A) Representative images of cultures stained for sarcomeric alpha-actinin (SAA),

myogenin (MyoG), and DAPI. (B-C) Quantifications of (B) SAA area and (C) MyoG-positive nuclei (N = 1 differentiation and n = 3 replicates per hiPSC line).

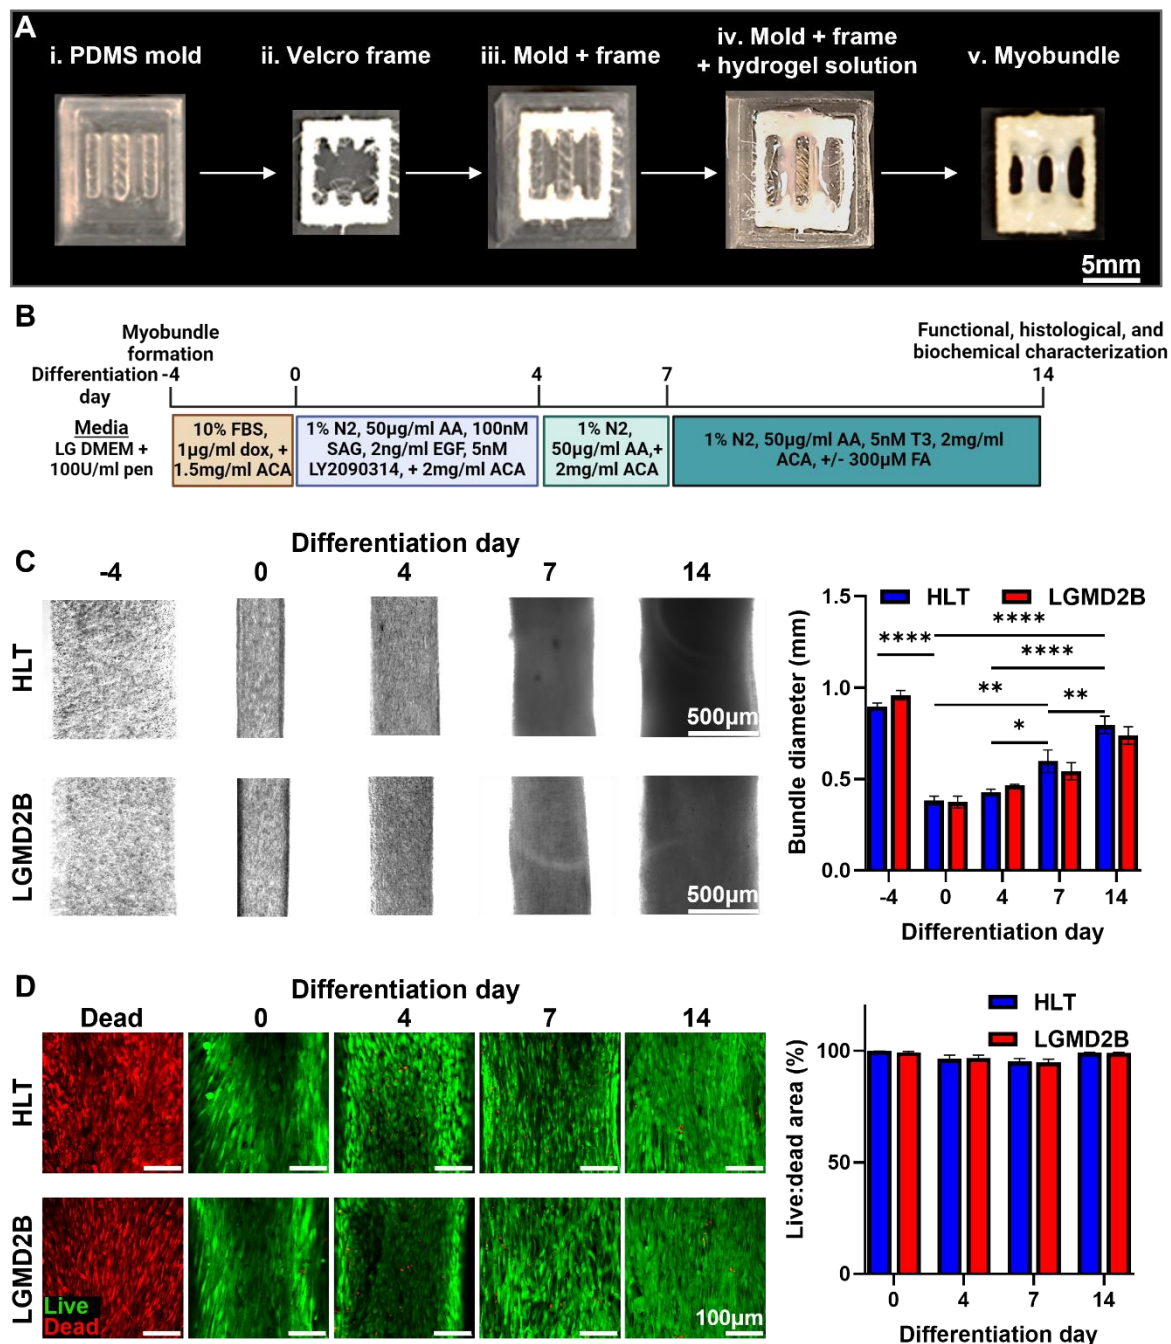

**Figure S3. Myobundle formation and culture.** (A) Representative images of myobundle fabrication process. (B) Schematic depicting media composition used during myobundle culture. (C) Representative brightfield images and quantification of myobundle width over culture duration (N = 1 differentiation and 1 hiPSC line, n = 7-8 replicates per line) (D) Representative live/dead images and corresponding quantification (N = 1 & 1 hiPSC line, n = 6). LG, low glucose; pen, penicillin; dox, doxycycline; FBS, fetal bovine serum; ACA, aminocaproic acid; AA, ascorbic acid-2-phosphate; SAG, smoothed agonist; EGF, epidermal growth factor; LY2090314, GSK3 $\beta$  inhibitor; T3, triiodothyronine; FA, fatty acid. \*P<0.05, \*\*P<0.01, \*\*\*\*P<0.0001

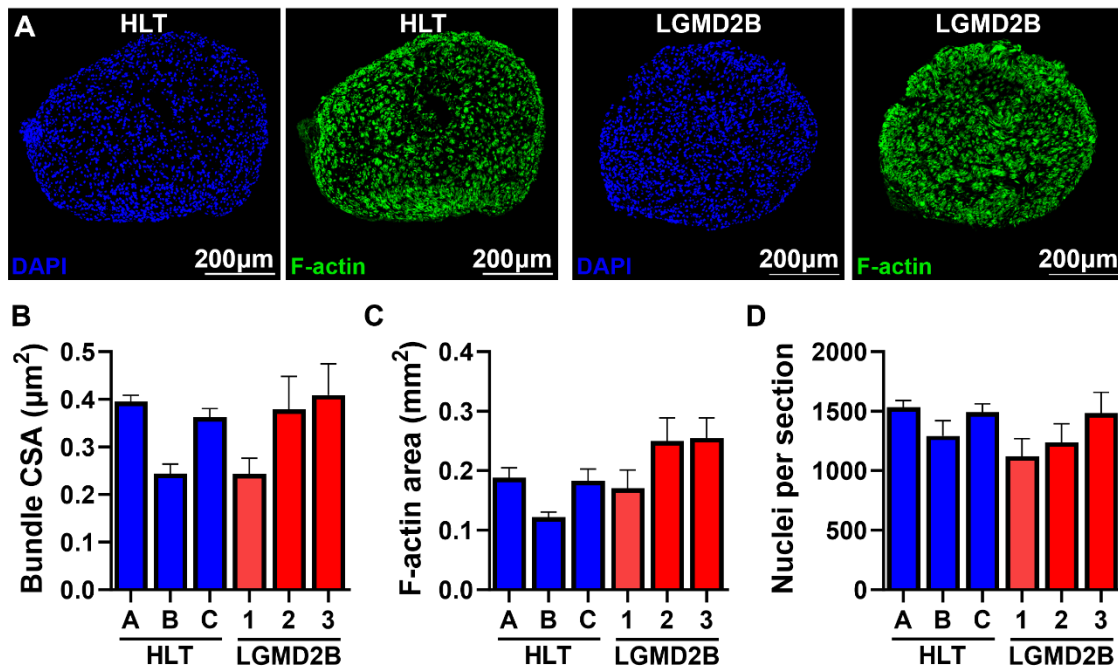

**Figure S4. Cross-sectional analysis of 2-wk healthy and LGMD2B myobundles.** (A) Representative images of 2-wk myobundle cross-sections stained for filamentous actin (F-actin) and DAPI. (B-C) Quantifications of (B) entire myobundle cross-sectional area (CSA), (C) F-actin<sup>+</sup> area, and (D) nuclei per cross-section (N = 1 differentiation and n = 6-8 myobundles per hiPSC line).

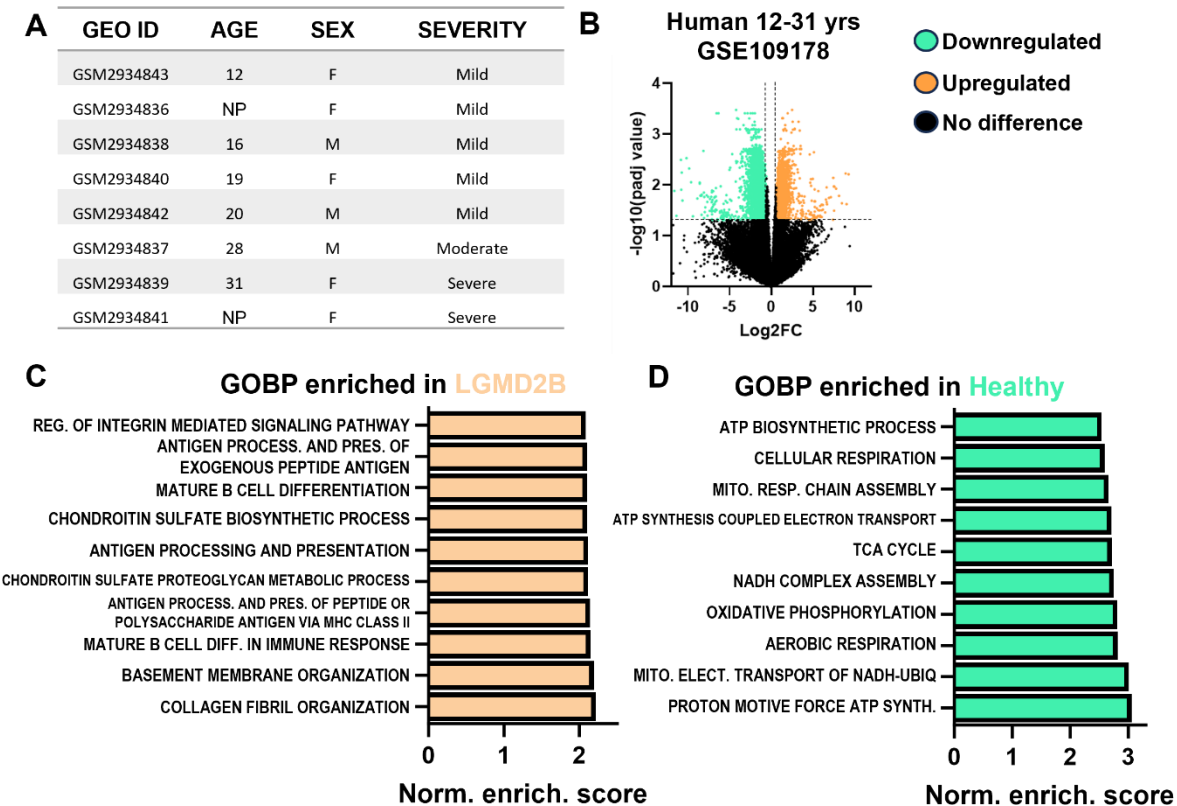

**Figure S5. Microarray analysis of human LGMD2B muscle samples.** (A) LGMD2B patient information (NP = not provided). (B) Volcano plot of probes detected in GSE109178. (C-D) Top 10 differentially regulated gene ontology biological processes (GOBP) in (C) LGMD2B and (D) healthy donors.

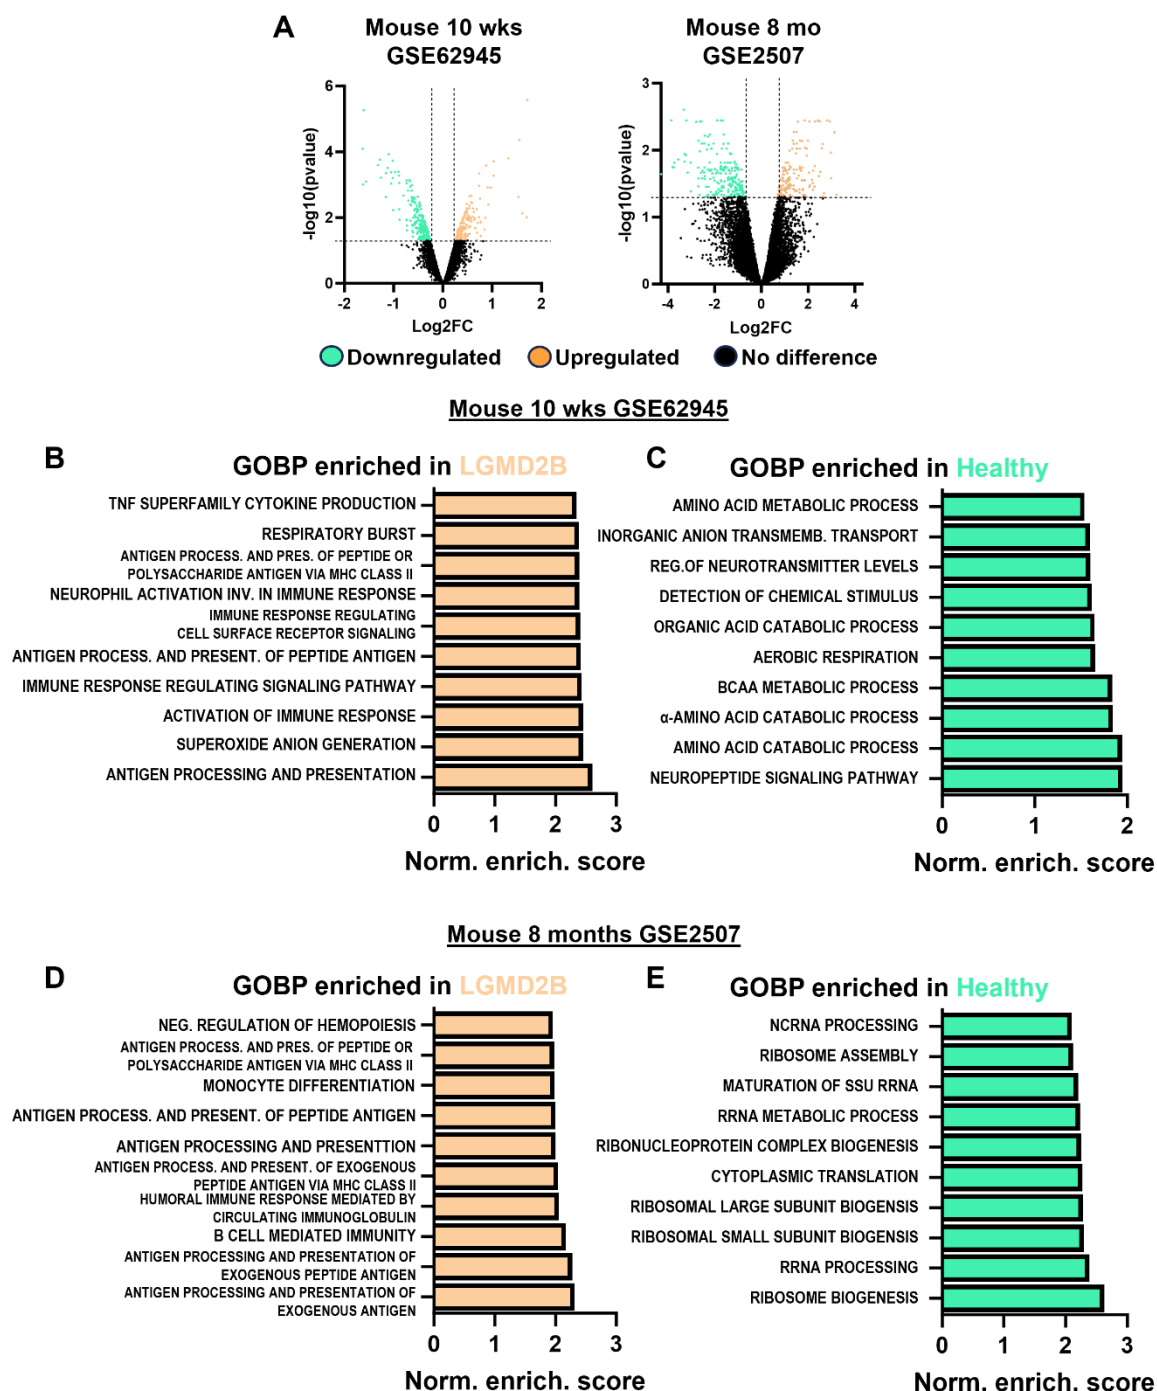

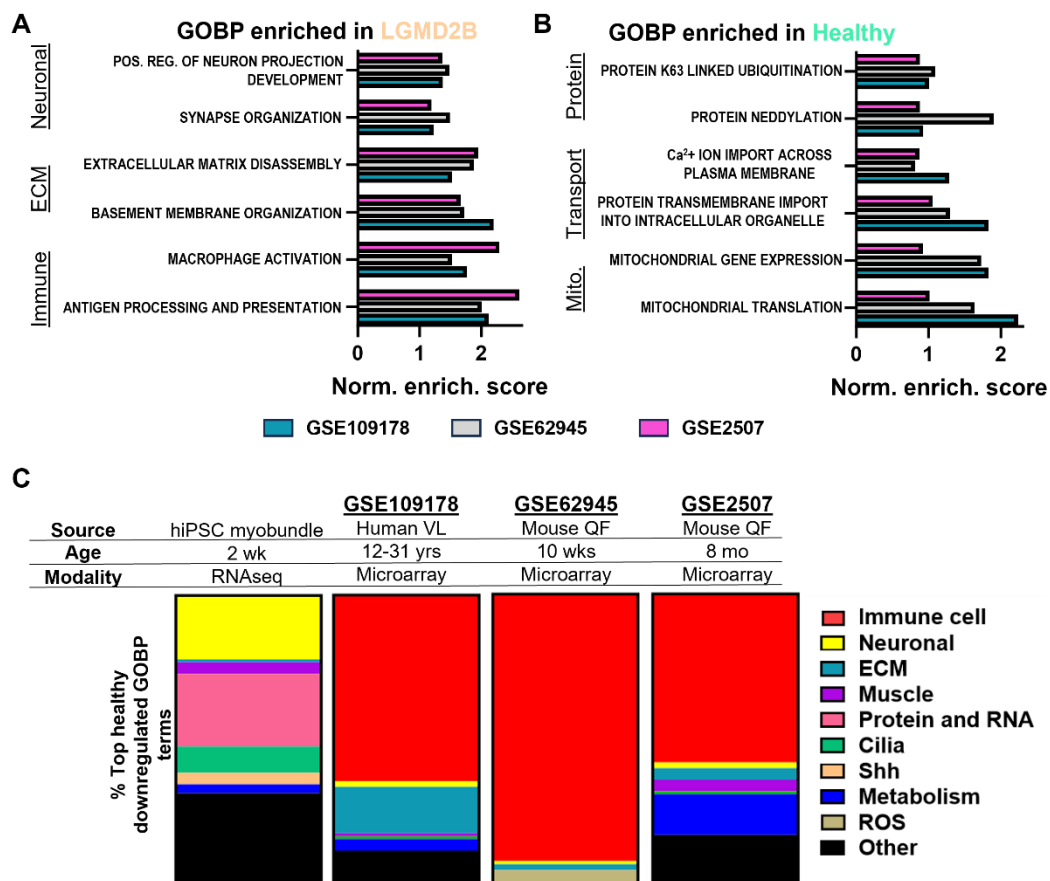

**Figure S7. Gene ontology analysis of human and mouse myobundle and microarray data.** (A,B) Representative gene ontology (GO) terms significantly enriched in (A) LGMD2B and (B) healthy human and mouse DNA microarray datasets. (C) Comparison of GOBP terms grouped by biological function upregulated in LGMD2B vs. healthy muscle in myobundle RNA-seq and native human and mouse microarray datasets.

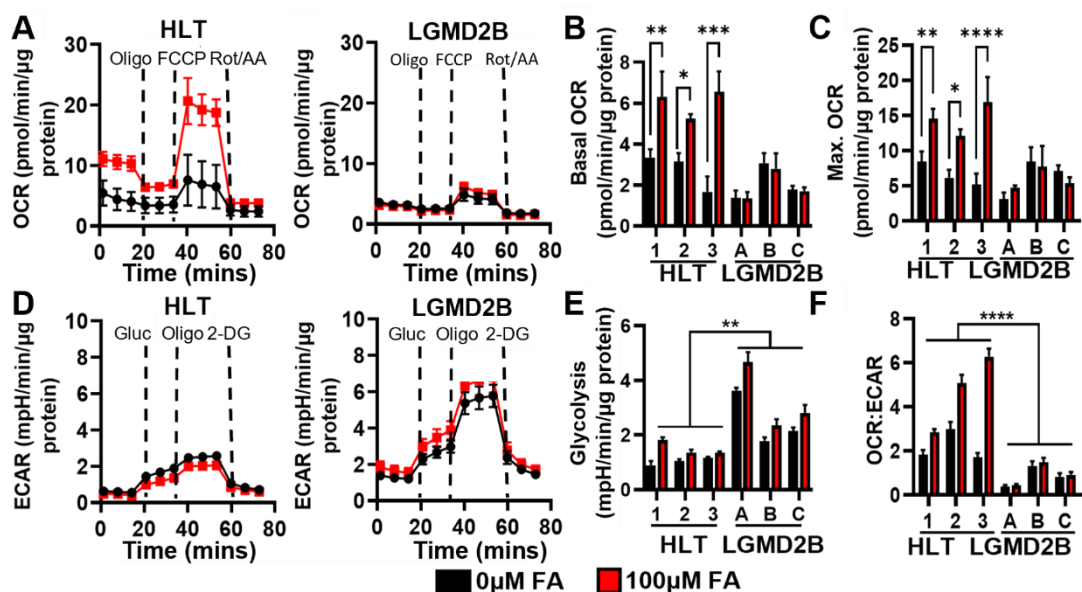

**Figure S8. Cellular bioenergetics in healthy and LGMD2B myotubes.** (A) Representative oxygen consumption rate (OCR) traces of healthy and LGMD2B myotubes cultured in 2D monolayers for 8 days and treated with 0 μM or 100 μM FA during the last 4 days of culture.

(B,C) Quantified (C) basal and (D) maximal OCR (N=1 differentiation, n=8-12 wells per group). (D) Representative extracellular acidification rate (ECAR) traces of healthy and LGMD2B myotubes cultured in 2D monolayers for 8 days and treated with 0  $\mu$ M or 100  $\mu$ M FA during the last 4 days of culture. (E,F) Quantified (E) basal ECAR and (F) OCR:ECAR ratio (N=1, n=8-12). \*P<0.05, \*\*p<0.01, \*\*\*\*P<0.001.

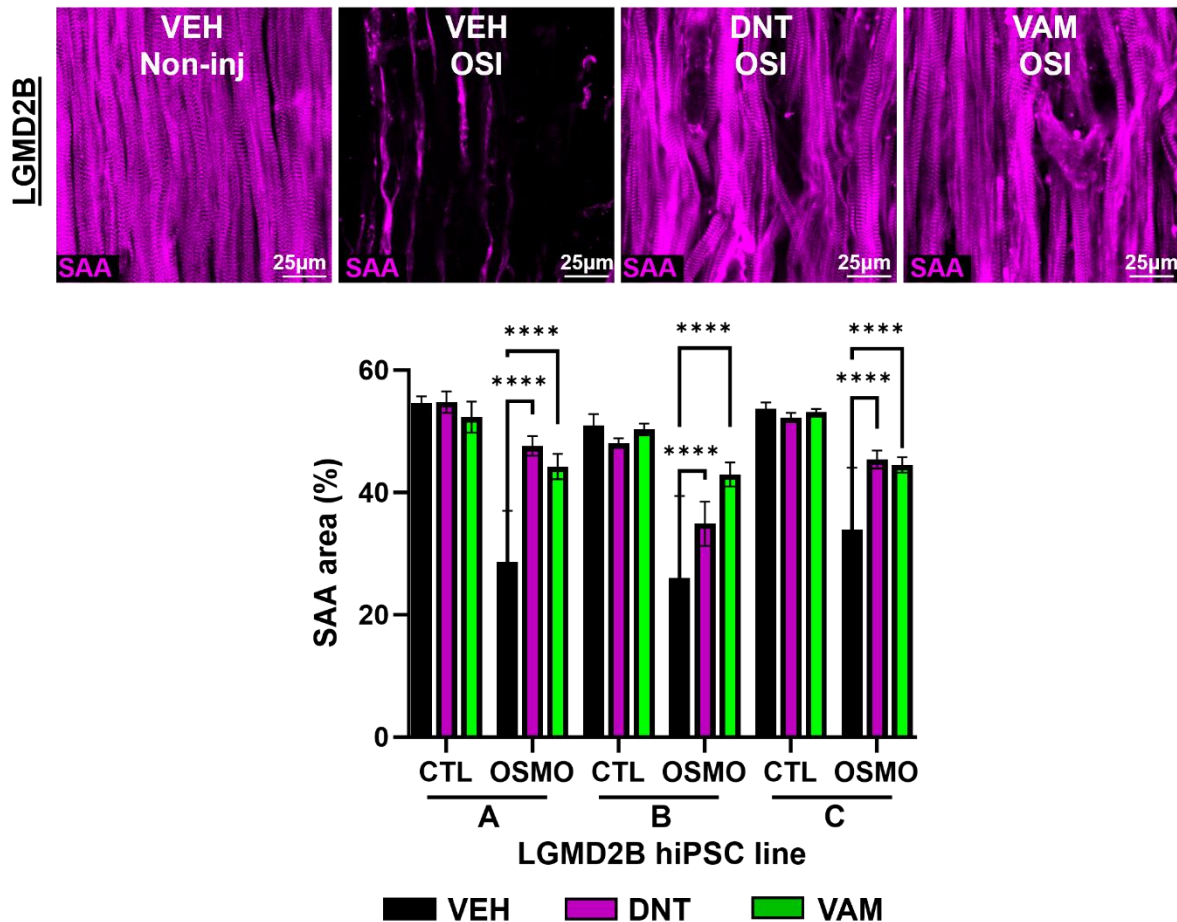

**Figure S9. Membrane repair in dantrolene- and vamorolone-treated LGMD2B myobundles.** LGMD2B myobundles were treated for 1 week with vehicle (VEH), dantrolene (DNT), or vamorolone (VAM) before undergoing osmotic shock injury (OSI). Representative whole-myobundle images of non-injured (non-inj) and OSI myobundles stained for sarcomeric alpha-actinin (SAA) with corresponding quantification of SAA<sup>+</sup> area (N = 1 differentiation and n = 3 bundles per hiPSC line). \*\*\*\*P<0.001 vs. VEH.

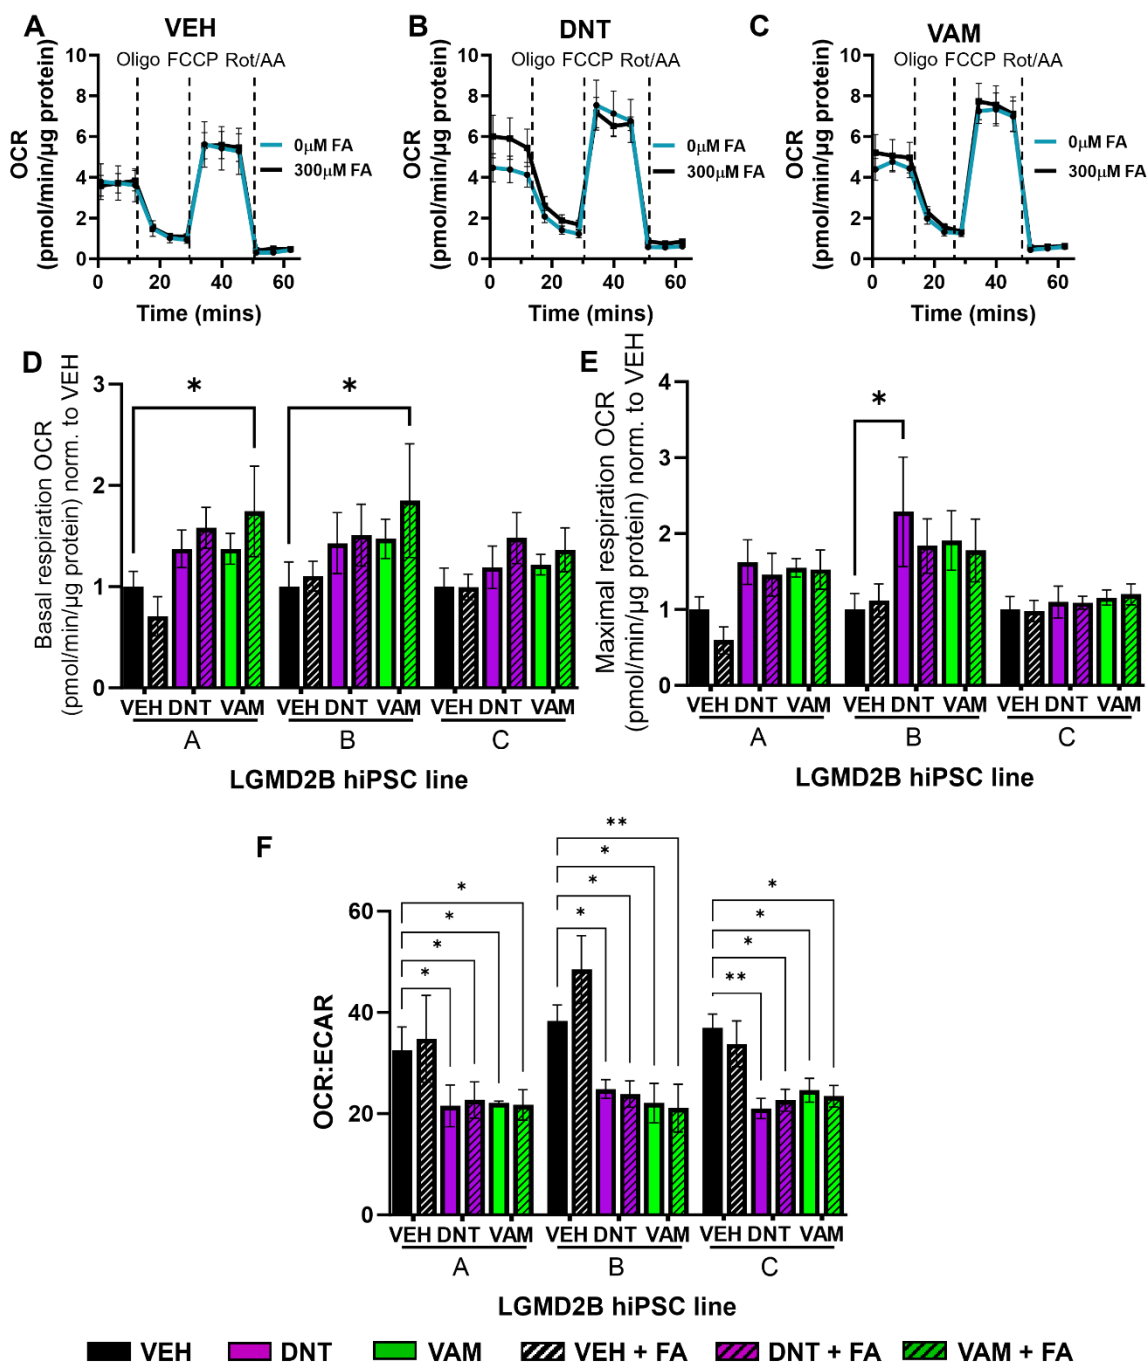

**Figure S10. Cellular bioenergetics of danrolene and vamorolone treated LGMD2B myobundles.** (A-C) Representative seahorse oxygen consumption rate (OCR) traces in (A) vehicle (VEH), (B) danrolene (DNT), and (C) vamorolone (VAM) treated LGMD2B myobundles with or without 300  $\mu$ M fatty acids (FA). Corresponding quantifications of (D) basal respiration, (E) maximal respiration, and (F) OCR:ECAR ( $n = 5-10$  myobundles per group). \* $P < 0.05$ , \*\* $P < 0.01$  vs. VEH.



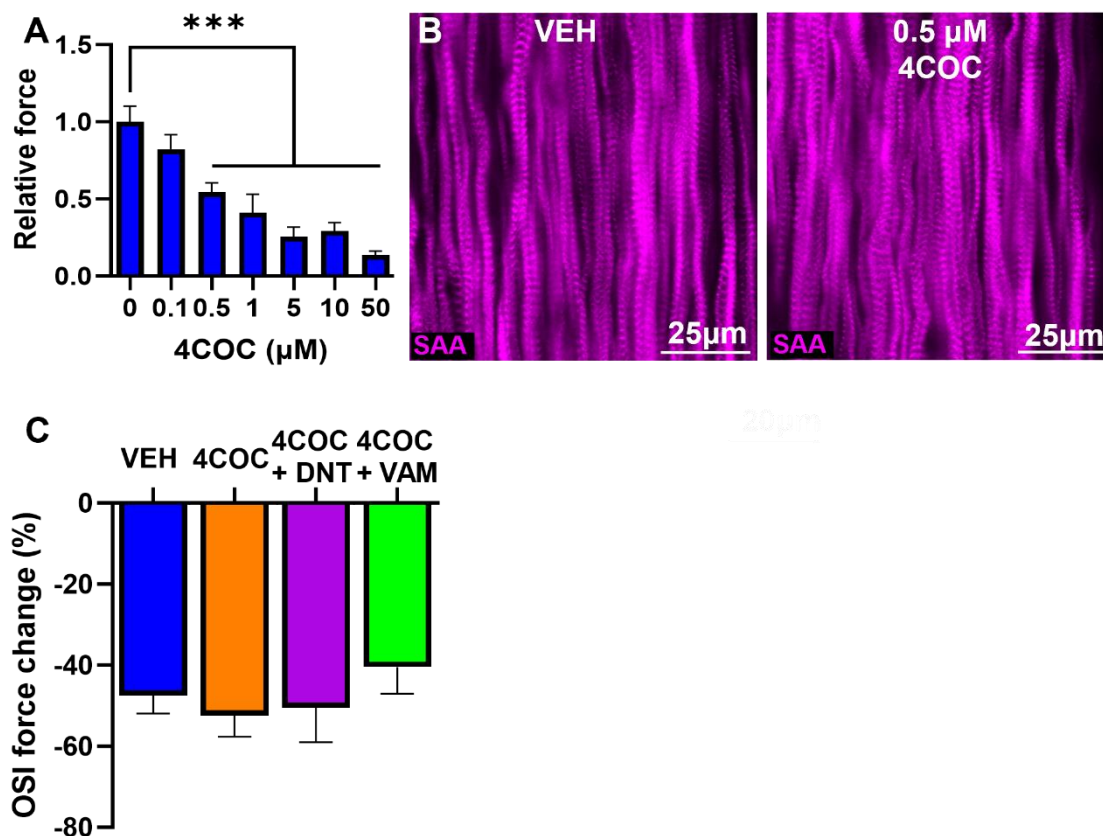

**Figure S11. Effects of pharmacologically induced RyR leak on healthy myobundles.** (A) Dose-dependent effect of 4COC on myobundle force generation (N = 1, n=3-4 per group). (B) Representative staining of sarcomeric alpha actinin (SAA) in vehicle (VEH) and 0.5  $\mu\text{M}$  4COC treated tissues. (C) Quantification of force change following OSI injury (N = 1 differentiation and n = 4-5 myobundles per group).

| Media and solutions     | Formulation                                                                                                                                                                                                                                             |
|-------------------------|---------------------------------------------------------------------------------------------------------------------------------------------------------------------------------------------------------------------------------------------------------|
| Neutralizing media      | Low glucose DMEM supplemented with DNaseI (20 $\mu\text{g}/\text{mL}$ , Sigma) and 50% FBS (Hyclone)                                                                                                                                                    |
| Sorting solution        | E6 media supplemented with Y27632 (10 $\mu\text{M}$ , Tocris), Doxycycline (1 $\mu\text{g}/\text{mL}$ , Sigma), DNaseI (20 $\mu\text{g}/\text{mL}$ , Sigma), 1% penicillin/streptomycin (Thermo)                                                        |
| Collecting solution     | FBS (Hyclone) supplemented with Y27632 (10 $\mu\text{M}$ , Tocris), Doxycycline (1 $\mu\text{g}/\text{mL}$ , Sigma), 1% penicillin/streptomycin (Thermo)                                                                                                |
| Expansion media         | Low glucose DMEM (Thermo) supplemented with 10% FBS (Hyclone), hEGF (10 $\mu\text{g}/\text{mL}$ ), Dexamethasone (0.4 $\mu\text{g}/\text{mL}$ ) Doxycycline (1 $\mu\text{g}/\text{mL}$ , Sigma), 1% penicillin/streptomycin (Thermo)                    |
| Differentiation media 1 | Low glucose DMEM (Thermo) supplemented with 1x N2 supplement (Thermo), penicillin G (100 unit/mL, Sigma), 2 mg/ml aminocaproic acid (Sigma), 0.1 $\mu\text{M}$ smoothed agonist (Cayman chemical), EGF (2 ng/ml, Peprotech), LY209314 (Cayman chemical) |
| Differentiation media 2 | Low glucose DMEM (Thermo) supplemented with 1x N2 supplement (Thermo), penicillin G (100 unit/mL, Sigma), 2 mg/ml aminocaproic acid (Sigma),                                                                                                            |
| Differentiation media 3 | Low glucose DMEM (Thermo) supplemented with 1x N2                                                                                                                                                                                                       |

|                       |                                                                                                                                                                                |
|-----------------------|--------------------------------------------------------------------------------------------------------------------------------------------------------------------------------|
|                       | supplement (Thermo), penicillin G (100 unit/mL, Sigma), 2 mg/ml aminocaproic acid (Sigma), 5 nM T3 (Sigma), 200 $\mu$ M carnitine, and 10 ng/ml biotin.                        |
| 2D seahorse media     | Seahorse XF DMEM, 5 mM glucose, 4 mM glutamine, 1 mM pyruvate, 0.1% ITS-X, 200 $\mu$ M carnitine, and 300 $\mu$ M fatty acids (1:1:1 oleic, linoleic, and palmitic acid)       |
| 3D seahorse media     | Phys AA MEM (Thermo), 5 mM glucose, 2 mM glutamine, 0.2 mM pyruvate, 0.1% ITS-X, 200 $\mu$ M carnitine, and 300 $\mu$ M fatty acids (1:1:1 oleic, linoleic, and palmitic acid) |
| Cell/hydrogel mixture | 12.5 million cells/mL in expansion media, bovine fibrinogen (4 mg/mL, Sigma), growth factor reduced matrigel (20% v/v, Corning), thrombin (0.2 U, Sigma)                       |

**Table S1. Cell culture media and solutions**

| Antibody                 | Application | Dilution                  | Company | Product No.      |
|--------------------------|-------------|---------------------------|---------|------------------|
| Dysferlin                | IF          | 1:200                     | Abcam   | Ab124684         |
| Dysferlin                | WB          | 1:500                     | Leica   | NCL-Hamlet-2     |
| Fast myosin heavy chain  | IF          | 1:200                     | DSHB    | F59              |
| Myosin heavy chain       | WB          | 1:1000                    | DSHB    | MF20             |
| Sarcomeric alpha actinin | IF, WB      | IF (1:200)<br>WB (1:1000) | Sigma   | A7732            |
| Myomesin 2               | IF          | 1:200                     | DSHB    | mMaC myomesin B4 |
| Titin                    | IF          | 1:200                     | DSHB    | 9D10             |
| Pax7                     | IF          | 1:200                     | DSHB    | Pax7             |
| Myf5                     | IF          | 1:200                     | SCBT    | Sc-302           |
| Myogenin                 | IF          | 1:200                     | Abcam   | Ab124800         |
| RyR1                     | WB          | 1:1000                    | Thermo  | MA3-925          |
| DHPRa                    | WB          | 1:500                     | DSHB    | IIC12D4          |
| F-actin 488              | IF          | 1:400                     | Thermo  | A12379           |
| DAPI                     | IF          | 1:400                     | Sigma   | D1306            |
| LipidSpot 610            | IF          | 1:500                     | Biotium | 70069            |

**Table S2. Antibody information****Movie S1. Representative 2 week healthy and LGMD2B myobundle calcium transients.**
